# Supplementary material for: Absence of Cross-Reactivity between Sulfonamide Antibiotics and Sulfonamide Nonantibiotics
Source: Atypon-hosted journal article supplement (doi:10.1056/nejmoa022963), 2003-10-22
Supplement: nejm_strom_1628sa1-2.pdf [file nejm_strom_1628sa1-2.pdf]

# Supplementary Appendix

This appendix has been provided by the authors to give readers additional information about their work.

Supplement to: Strom BL, Schinnar R, Apter AJ, et al. Absence of Cross-Reactivity between Sulfonamide Antibiotics and Sulfonamide Nonantibiotics. *N Engl J Med* 2003;349:1628-35.

**Supplementary Appendix 1. Diagnoses Included in the Narrow and Broad Definitions of Hypersensitivity or Allergic Reaction.**

**Narrow definition**

Allergic urticaria  
Anaphylactic shock  
Angioneurotic edema  
Drug-induced dermatitis  
Erythema multiforme  
Laryngeal spasm  
Shock, unspecified  
Shock without mention of trauma  
Stevens–Johnson syndrome  
Toxic epidermal necrolysis  
Upper respiratory tract hypersensitivity reactions  
Urticaria  
Urticaria, unspecified  
Selected codes for adverse drug reactions  
    Drug allergy  
    Allergy drug by mouth  
    Allergic drug reaction, not specified  
    Hypersensitivity, not specified  
    Drug hypersensitivity, not specified  
    Adverse reaction to ophthalmic antiinfective agents and other ophthalmic drugs  
    Adverse reaction to antiinfective agents and other enteric drugs  
    Adverse reaction to locally administered antiinfective drug

**Additional diagnoses included in the broad definition**

Asthma  
Eczema  
Unspecified adverse effect of a drug, medicinal agent, or biologic substance

**Supplementary Appendix 2. Potential Confounding Variables.**

**Demographic variables**

Age  
Sex

**Preexisting hypersensitivity or adverse reactions as listed in Supplementary Appendix 1**

**Potential confounding drugs**

Anticonvulsants  
Antihistamines  
Systemic corticosteroids  
Other drugs used for asthma

**Potential confounding diagnosis**

Allergic rhinitis  
Amyloid disease  
Arteritis  
Behçet's syndrome  
Churg–Strauss syndrome  
Collagen vascular disease  
Erythromelalgia  
Giant-cell arteritis  
Hay fever  
Mixed connective-tissue disease  
Polyarteritis nodosa  
Polychondritis  
Polymyalgia rheumatica  
Raynaud's disease  
Rheumatoid arthritis  
Scleroderma  
Spondyloarthritis  
Systemic lupus erythematosus  
Takayasu's arteritis  
Vasculitis  
Wegener's granulomatosis
